# Supplementary material for: Chiral weak ferromagnets formed in one-dimensional organic–inorganic hybrid manganese chloride hydrates
Source: Royal Society of Chemistry journal article supplement (doi:10.1039/d2dt02928f), 2022-01-01
Supplement: d2dt02928f1.pdf [file d2dt02928f1.pdf]

*Supporting Information*

**Chiral weak ferromagnets formed in one-dimensional organic-inorganic hybrid manganese chloride hydrates**

Kouji Taniguchi\*<sup>1,2</sup>, Po-Jung Huang<sup>3</sup>, Shojiro Kimura<sup>3</sup>, and Hitoshi Miyasaka<sup>3</sup>

<sup>1</sup>*Department of Chemistry, School of Science, Tokyo Institute of Technology, 2-12-1 Ookayama, Tokyo, 152-8551, Japan*

<sup>2</sup>*PRESTO, Japan Science and Technology Agency (JST), 5-3 Yonbancho, Chiyoda-ku, Tokyo 102-8666, Japan*

<sup>3</sup>*Institute for Materials Research, Tohoku University, 2-1-1 Katahira, Sendai, 980-8577, Japan*

Corresponding author\*

Kouji Taniguchi

*Department of Chemistry, School of Science, Tokyo Institute of Technology, 2-12-1 Ookayama, Tokyo, 152-8551, Japan*

E-mail: [taniguchi.k.ap@m.titech.ac.jp](mailto:taniguchi.k.ap@m.titech.ac.jp)

**Table S1****Crystallographic Data for S-1.**

|                                                                |                                                                                                                    |
|----------------------------------------------------------------|--------------------------------------------------------------------------------------------------------------------|
| Compound                                                       | (S- $\beta$ -MePhC <sub>2</sub> H <sub>3</sub> NH <sub>3</sub> ) <sub>2</sub> MnCl <sub>4</sub> (H <sub>2</sub> O) |
| Empirical formula                                              | C <sub>18</sub> H <sub>30</sub> Cl <sub>4</sub> MnN <sub>2</sub> O                                                 |
| Formula weight                                                 | 487.18                                                                                                             |
| Temperature/K                                                  | 103                                                                                                                |
| Crystal system                                                 | monoclinic                                                                                                         |
| Space group                                                    | <i>P</i> 2 <sub>1</sub> (#4)                                                                                       |
| a/Å                                                            | 17.5072(5)                                                                                                         |
| b/Å                                                            | 7.27776(19)                                                                                                        |
| c/Å                                                            | 17.6298(7)                                                                                                         |
| $\alpha$ /°                                                    | 90                                                                                                                 |
| $\beta$ /°                                                     | 90.488(3)                                                                                                          |
| $\gamma$ /°                                                    | 90                                                                                                                 |
| Volume/Å <sup>3</sup>                                          | 2246.19(12)                                                                                                        |
| Z                                                              | 4                                                                                                                  |
| $\rho_{\text{calc}}$ /g cm <sup>-3</sup>                       | 1.441                                                                                                              |
| <i>F</i> <sub>000</sub>                                        | 1012.00                                                                                                            |
| $\lambda$ /Å                                                   | 0.71073                                                                                                            |
| $\mu$ (Mo K $\alpha$ )/cm <sup>-1</sup>                        | 1.073                                                                                                              |
| measured reflections                                           | 7764                                                                                                               |
| unique reflections                                             | 9912 ( <i>R</i> <sub>int</sub> = 0.0278)                                                                           |
| <i>R</i> <sub>1</sub> ( <i>I</i> > 2.00 $\sigma$ ( <i>I</i> )) | 0.0334                                                                                                             |
| <i>R</i> <sub>1</sub> (all data)                               | 0.0385                                                                                                             |
| <i>wR</i> <sub>2</sub> (all data),                             | 0.0783                                                                                                             |
| GOF                                                            | 1.021                                                                                                              |
| Flack parameter                                                | -0.002(13)                                                                                                         |
| CCDC                                                           | 2190484                                                                                                            |

**Table S2****Crystallographic Data for R-1.**

|                                                                |                                                                                                                             |
|----------------------------------------------------------------|-----------------------------------------------------------------------------------------------------------------------------|
| Compound                                                       | ( <i>R</i> - $\beta$ -MePhC <sub>2</sub> H <sub>3</sub> NH <sub>3</sub> ) <sub>2</sub> MnCl <sub>4</sub> (H <sub>2</sub> O) |
| Empirical formula                                              | C <sub>18</sub> H <sub>30</sub> Cl <sub>4</sub> MnN <sub>2</sub> O                                                          |
| Formula weight                                                 | 487.18                                                                                                                      |
| Temperature/K                                                  | 103                                                                                                                         |
| Crystal system                                                 | monoclinic                                                                                                                  |
| Space group                                                    | <i>P</i> 2 <sub>1</sub> (#4)                                                                                                |
| <i>a</i> /Å                                                    | 17.5439(4)                                                                                                                  |
| <i>b</i> /Å                                                    | 7.2896(2)                                                                                                                   |
| <i>c</i> /Å                                                    | 17.6559(5)                                                                                                                  |
| $\alpha$ /°                                                    | 90                                                                                                                          |
| $\beta$ /°                                                     | 90.502(2)                                                                                                                   |
| $\gamma$ /°                                                    | 90                                                                                                                          |
| Volume/Å <sup>3</sup>                                          | 2257.89(10)                                                                                                                 |
| <i>Z</i>                                                       | 4                                                                                                                           |
| $\rho_{\text{calc}}$ /g cm <sup>-3</sup>                       | 1.433                                                                                                                       |
| <i>F</i> <sub>000</sub>                                        | 1012                                                                                                                        |
| $\lambda$ /Å                                                   | 0.71073                                                                                                                     |
| $\mu$ (Mo K $\alpha$ )/cm <sup>-1</sup>                        | 1.068                                                                                                                       |
| measured reflections                                           | 33573                                                                                                                       |
| unique reflections                                             | 11472 ( <i>R</i> <sub>int</sub> = 0.0427)                                                                                   |
| <i>R</i> <sub>1</sub> ( <i>I</i> > 2.00 $\sigma$ ( <i>I</i> )) | 0.0307                                                                                                                      |
| <i>R</i> <sub>1</sub> (all data)                               | 0.0398                                                                                                                      |
| <i>wR</i> <sub>2</sub> (all data),                             | 0.0644                                                                                                                      |
| GOF                                                            | 1.009                                                                                                                       |
| Flack parameter                                                | -0.016(9)                                                                                                                   |
| CCDC                                                           | 2190483                                                                                                                     |

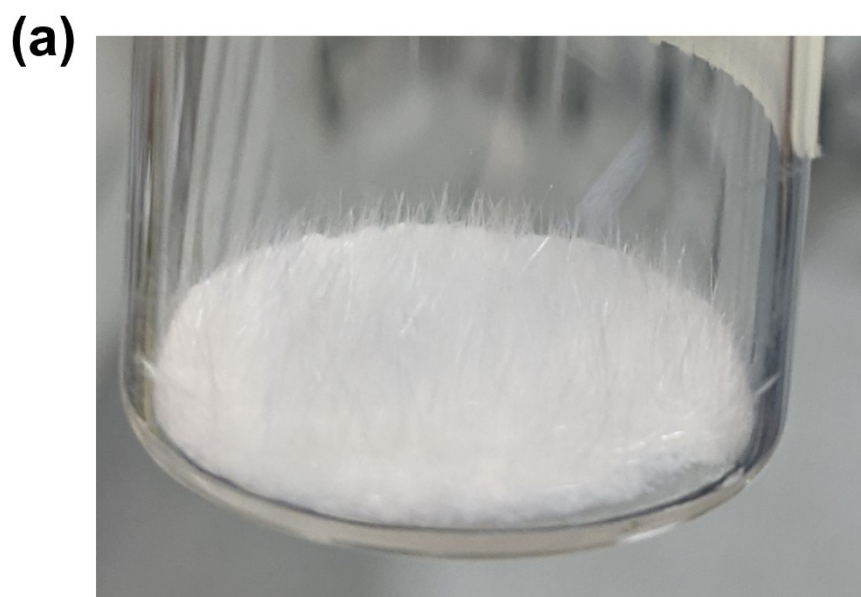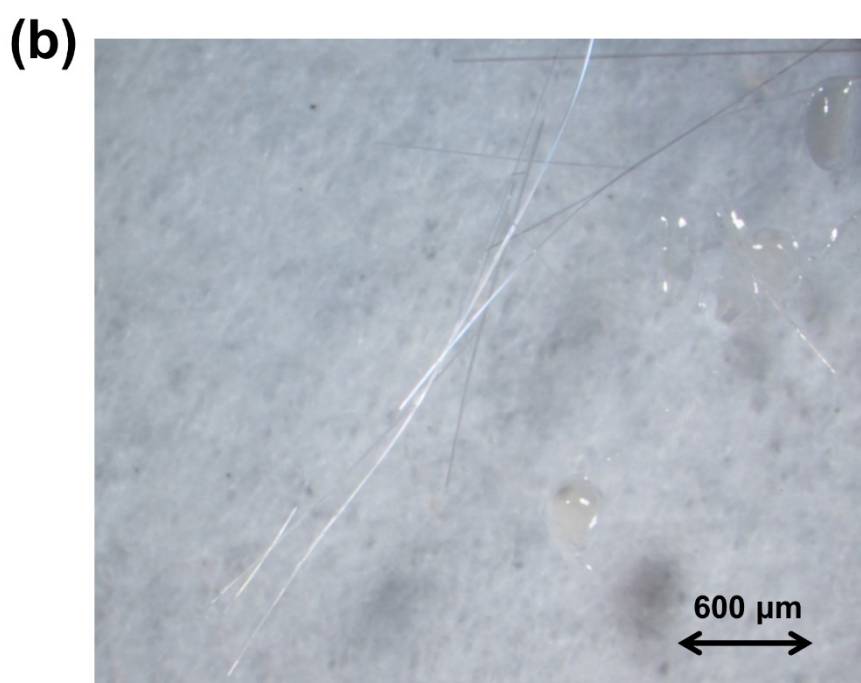

**Figure S1.** The picture of *R-1* crystals. (a) As grown crystals, (b) Expanded picture of needle like *R-1* crystals.

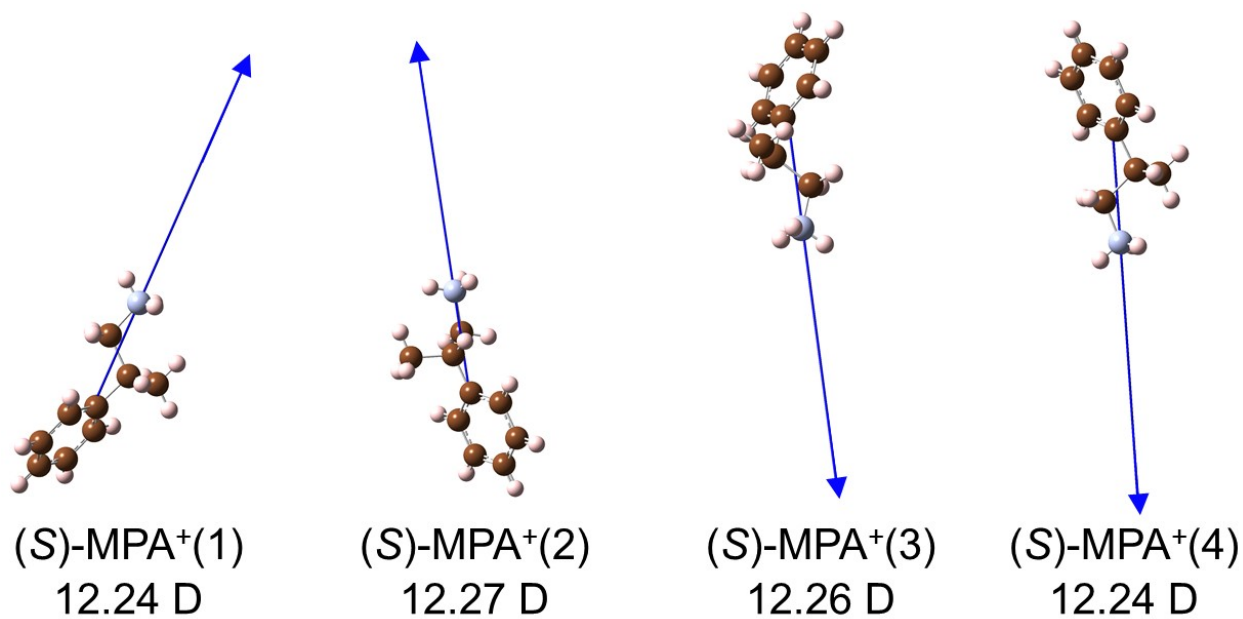

**Figure S2.** Calculated electric dipole moments of (S)-MPA<sup>+</sup> ions in the unit cells of **S-1**. The blue arrows indicate the direction of electric dipole moments. The structures of molecular cations are displayed with color codes C (brown), N (grey), H (pale pink).

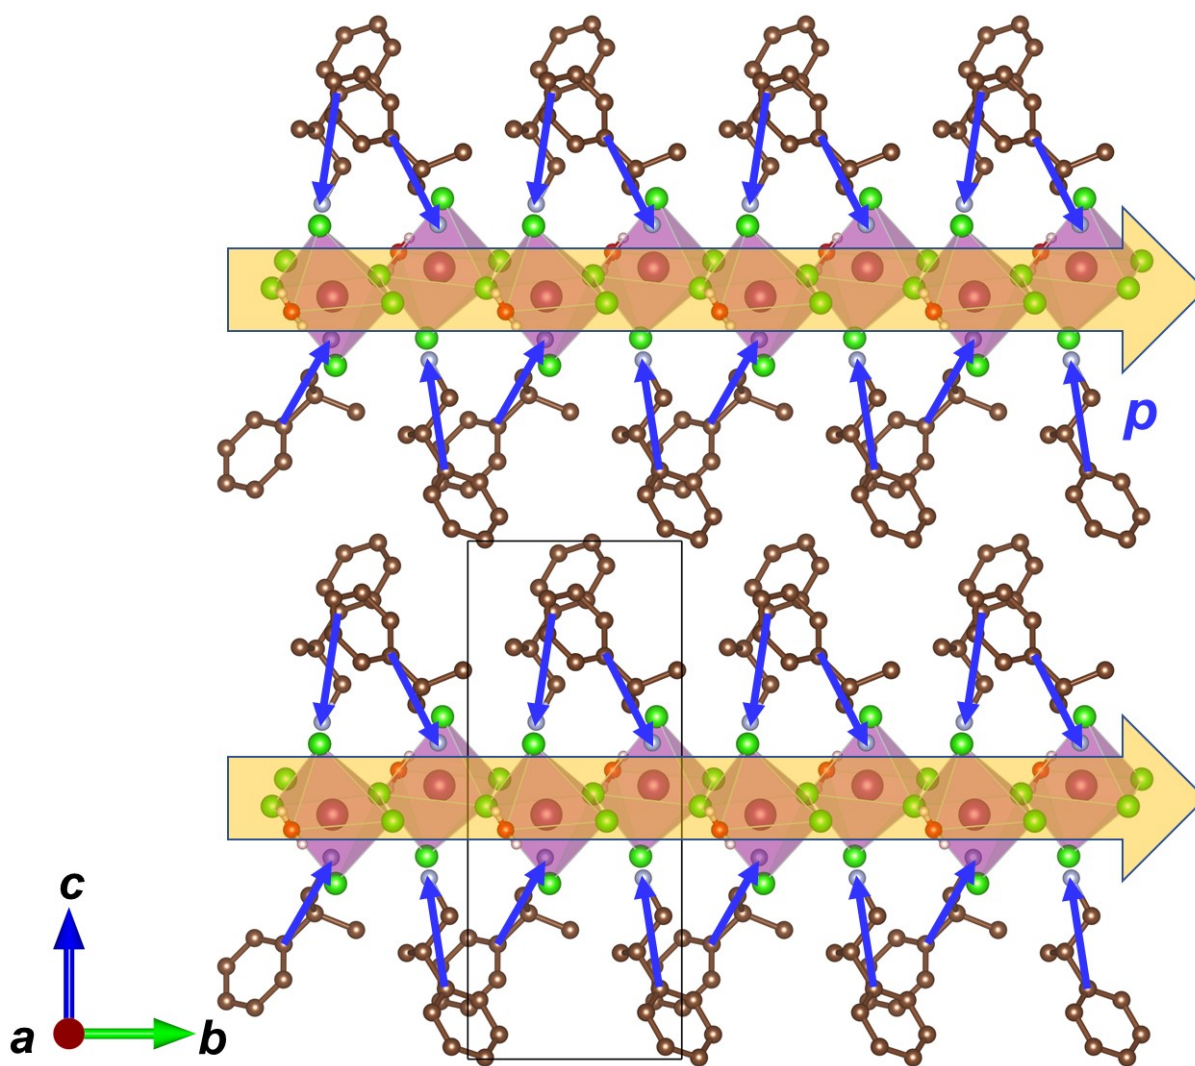

**Figure S3.** Arrangement of electric dipole moments of (*S*)-MPA<sup>+</sup> ions in crystal structures of **S-1**. The small blue arrows and the large transparent orange arrows represent electric dipole moments (*p*) of (*S*)-MPA<sup>+</sup> and electric polarization of each 1D-chain of manganese chloride hydrates from molecule components of **S-1**. The crystal structure of **S-1** projected along the [100] is displayed with color codes Mn (purple), Cl (yellowish green), C (brown), N (grey). Hydrogen atoms are omitted except for those in H<sub>2</sub>O for clarity.

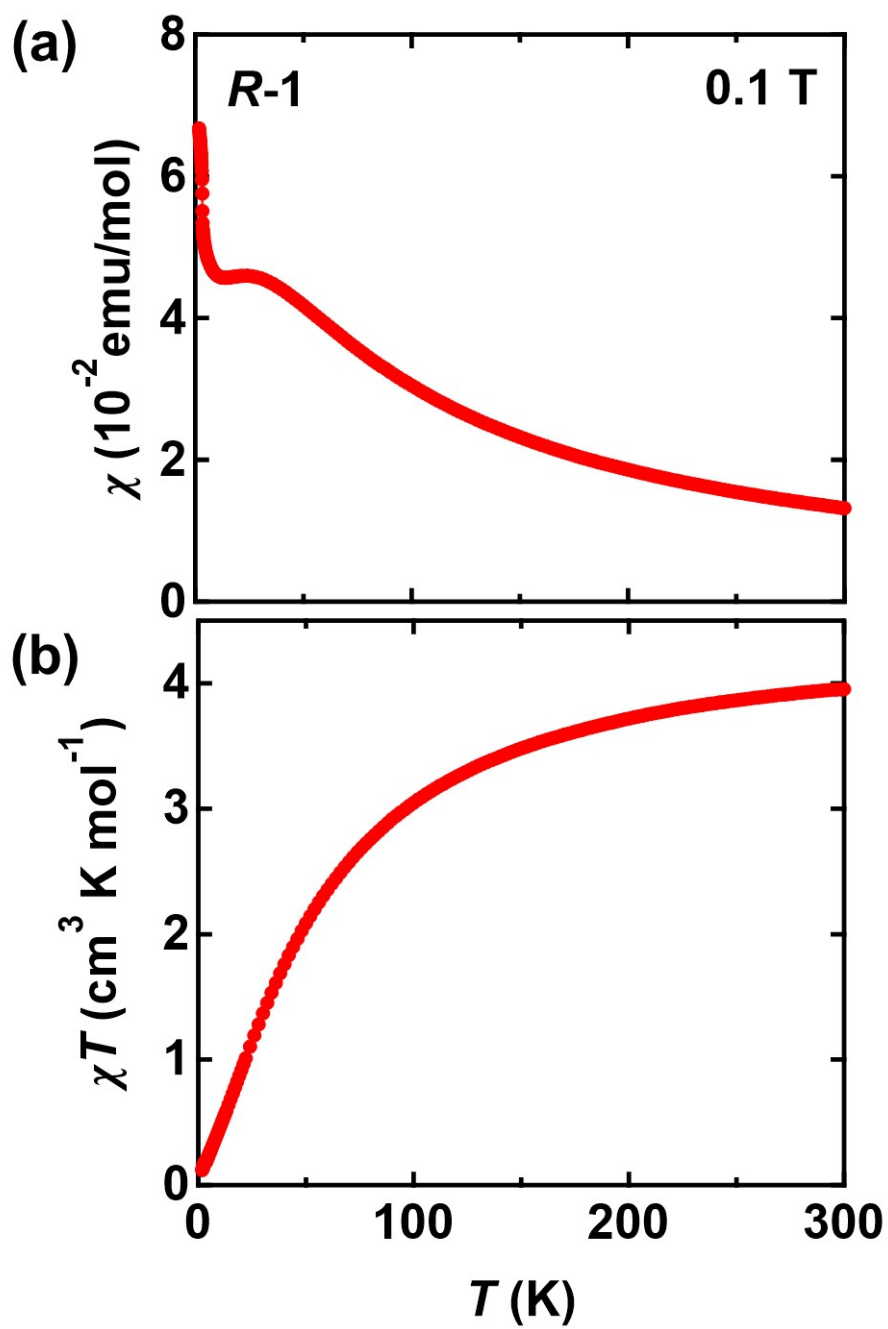

**Figure S4.** (a) Temperature dependence of magnetic susceptibility ( $\chi$ ) of  $R-1$  in 0.1 T. (b) Temperature dependences of  $\chi T$  for  $R-1$ .

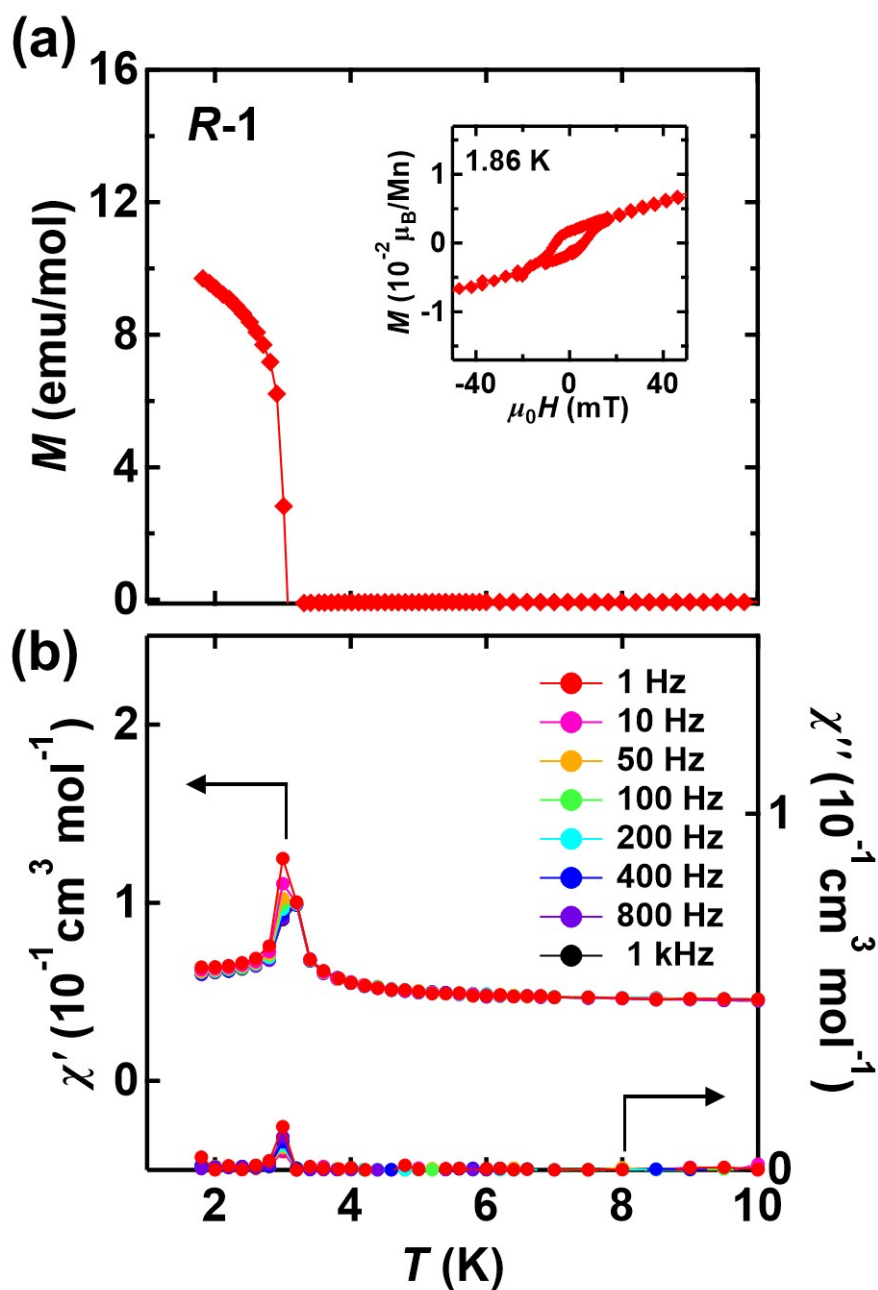

**Figure S5.** (a) Temperature dependence of the remnant magnetization of *R-1*. The inset shows magnetic field dependence of magnetization of *R-1* at 1.86 K. (b) Temperature dependence of AC susceptibility of *R-1*.
